# Supplementary material for: The biolabile 2′-O-pivaloyloxymethyl modification in an RNA helix: an NMR solution structure
Source: Royal Society of Chemistry journal article supplement (doi:10.1039/c3ob27005j), 2013-01-01
Supplement: c3ob27005j.pdf [file c3ob27005j.pdf]

## Supporting Information

# The Biolabile 2'-O-Pivaloyloxymethyl Modification in an RNA helix: an NMR Solution Structure

Carine Baraguey,<sup>\*a</sup> Eveline Lesclinier,<sup>b</sup> Thomas Lavergne,<sup>a</sup> Françoise Debart,<sup>a</sup> Piet Herdewijn<sup>b</sup> and Jean-Jacques Vasseur<sup>a</sup>

*a*

*IBMM UMR 5247 CNRS-UM1-UM2*

*Université Montpellier II*

*Place Eugene Bataillon, 34095 Montpellier Cedex 05 (France)*

*b*

*Rega Institute for Medical Research*

*Katholieke Universiteit Leuven*

*Minderbroedersstraat 10, 3000 Leuven (Belgium)*

### **Table of Contents**

- (1.) Characterization of the PivOM containing strand
- (2.) Hybridization of the natural and modified duplexes
- (3.) NMR data
- (4.) Structure analysis

### (1.) Characterization of the PivOM containing strand

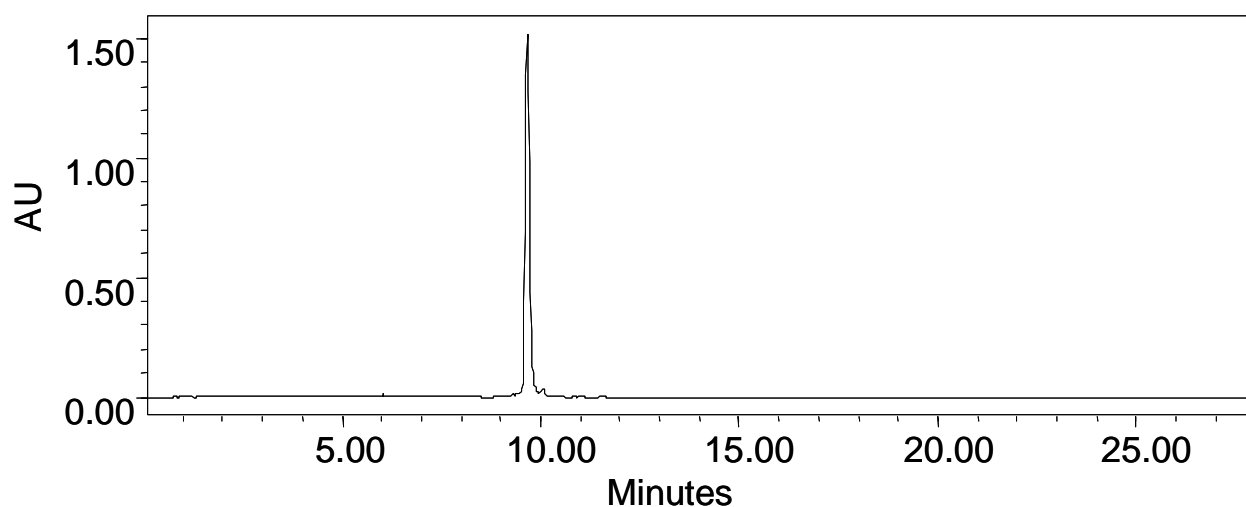

**Figure S1.** HPLC chromatogram of the pure modified 9-mer 5'-rCGCU<sub>Piv</sub>ACGCdT-3' after Na ions exchange (column Nucleosil C18 150 x 4.6 mm; flow rate 1 ml/min; 0 to 24 % of acetonitrile in TEEAc 0.05M pH7 buffer; UV detection at 260 nm).

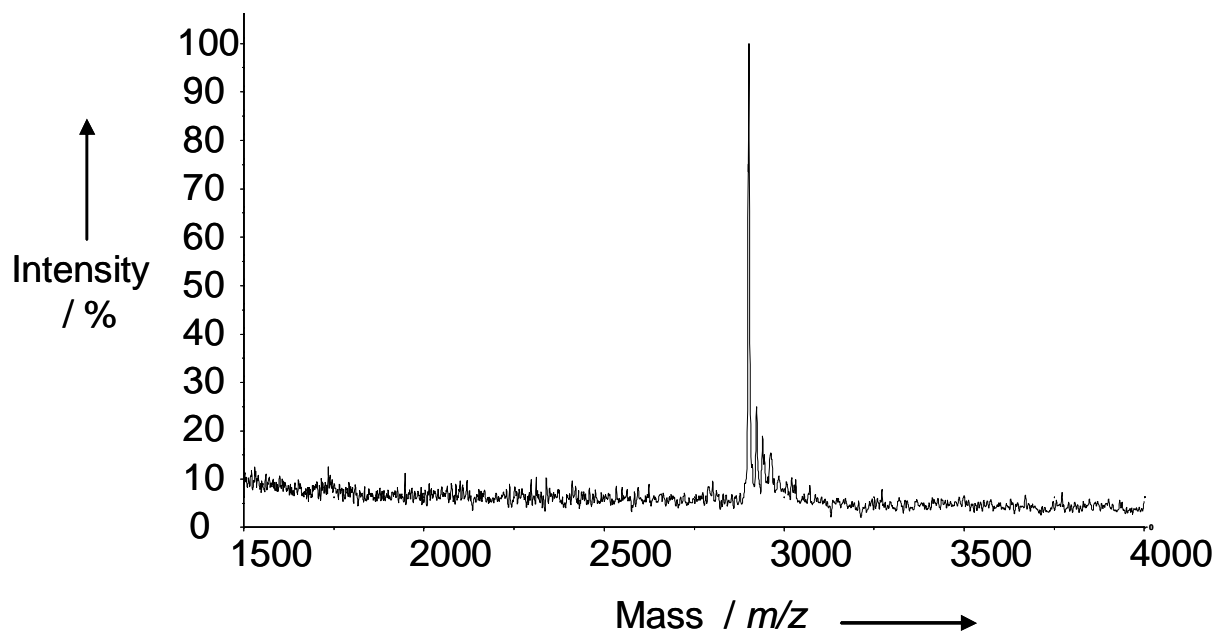

**Figure S2.** MALDI-TOF spectrum of the pure modified 9-mer 5'-r(CGCU<sub>Piv</sub>ACGC)dT-3' after Na ions exchange (matrix: THAP).

## (2.) Hybridization of the natural and modified duplexes

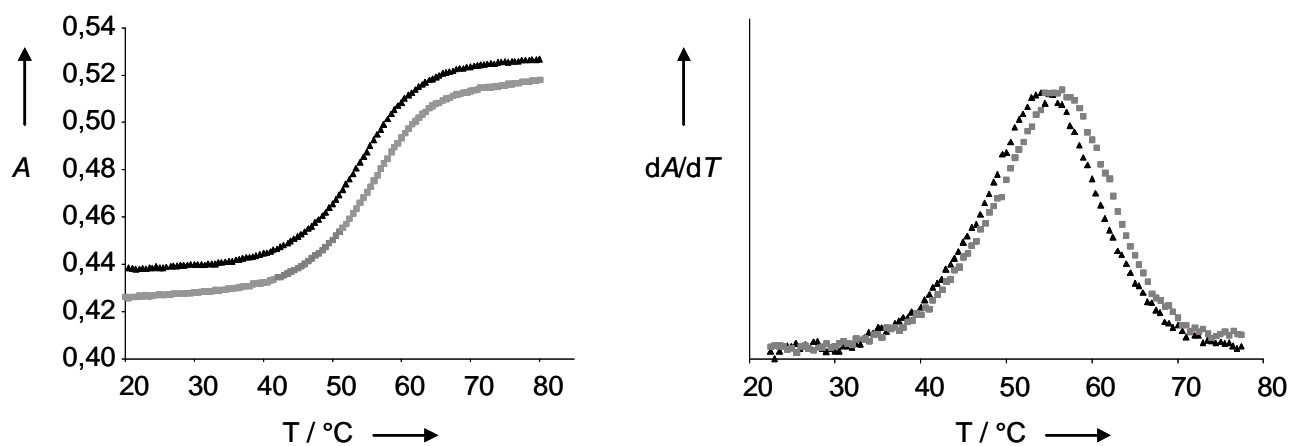

**Figure S3.** Melting curves (left) and their derivatives (right) for both modified ( ) and natural ( ) duplexes (hybridization).

### (3.) NMR data

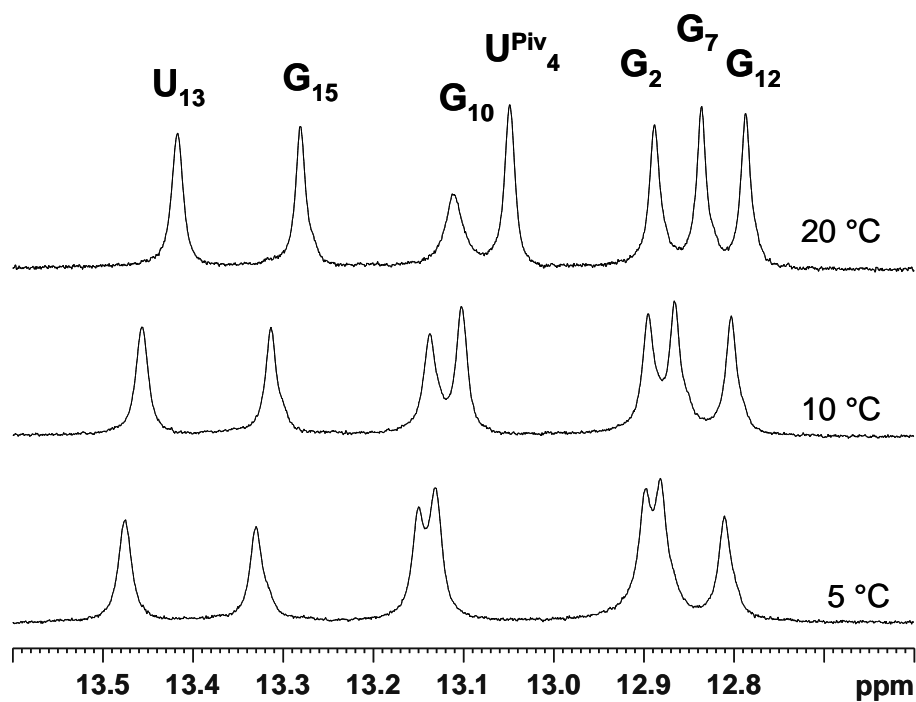

**Figure S4.** Imino protons region of the 1D  $^1\text{H}$  spectra in  $\text{H}_2\text{O}/\text{D}_2\text{O}$  of the duplex  $r(\text{CGCU}^*\text{ACGC})\text{dT}/r(\text{GCGUAGCG})\text{dT}$  at several temperatures.

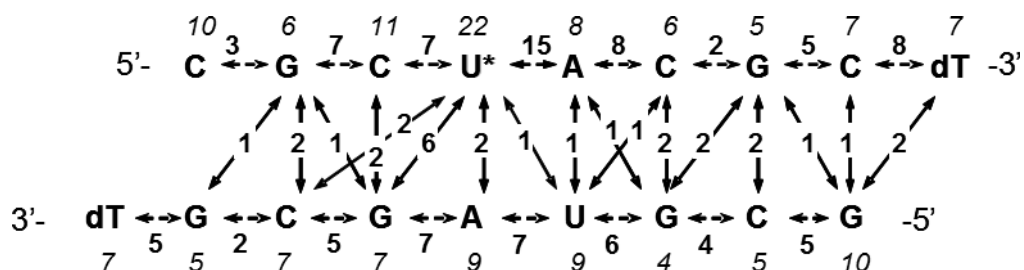

**Figure S5.** Distribution of the distance restraints extracted from the NOE. The numbers of inter- and intra-residue cross peaks are given in bold and italic characters respectively.

#### (4.) Structure analysis

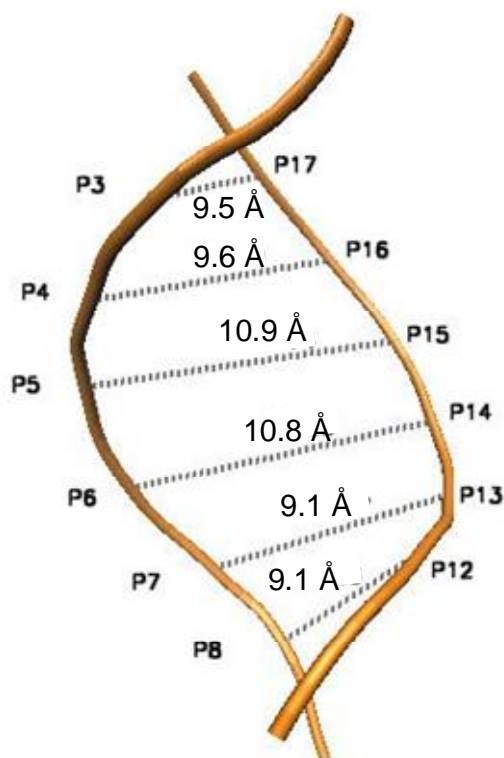

**Figure S6.** Minor groove width. The given values are the result of the smallest distances between two P atoms of each strand minus 5.8 Å (twice the Van der Waals radius of the phosphate group).

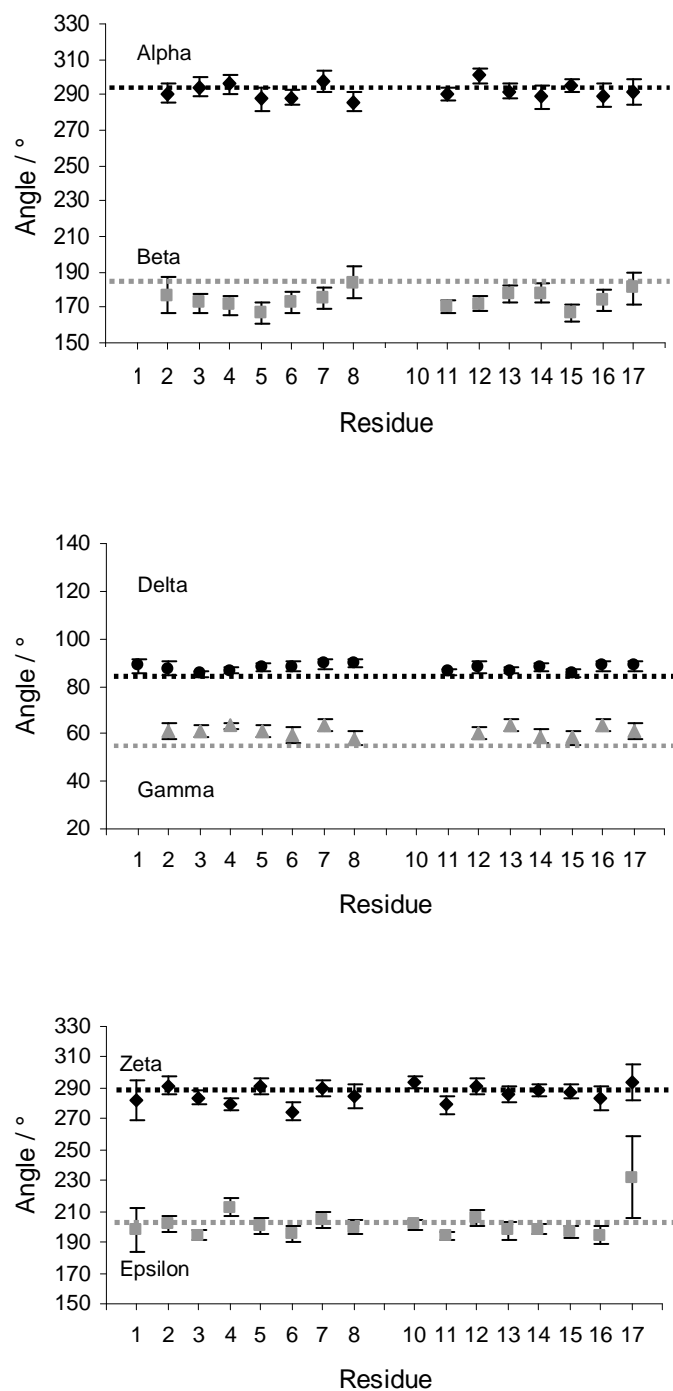

**Figure S7.** Averaged dihedral angles values for the backbone calculated with Curves+. The non significant angles ( $\gamma$  of C1 and G10 and all the angles for dT9 and dT18) were omitted for clarity. The dotted lines represent the angle values for the standard A-type helix.

**Table S1.** Backbone torsion angles and glycosidic angles for r(CGCU\*ACGC)dT:r(GCGUAGCG)dT. <sup>(a)</sup>

| Residue            | $\alpha$ | $\beta$  | $\gamma$ | $\delta$ | $\epsilon$ | $\zeta$  | $\chi$   |
|--------------------|----------|----------|----------|----------|------------|----------|----------|
| C1                 | -        | -        | 125 (94) | 88 (3)   | 198 (14)   | 282 (13) | 204 (13) |
| G2                 | 291 (5)  | 177 (10) | 61 (3)   | 87 (3)   | 202 (5)    | 292 (5)  | 193 (7)  |
| C3                 | 294 (5)  | 172 (5)  | 61 (2)   | 86 (1)   | 195 (3)    | 284 (5)  | 205 (5)  |
| U*4                | 296 (5)  | 171 (5)  | 63 (1)   | 87 (1)   | 213 (6)    | 280 (4)  | 204 (3)  |
| A5                 | 288 (7)  | 167 (6)  | 61 (2)   | 88 (2)   | 200 (5)    | 291 (5)  | 205 (2)  |
| C6                 | 288 (4)  | 173 (6)  | 59 (3)   | 88 (2)   | 195 (5)    | 275 (6)  | 214 (3)  |
| G7                 | 298 (6)  | 175 (6)  | 64 (2)   | 89 (2)   | 205 (6)    | 289 (5)  | 192 (6)  |
| C8                 | 286 (6)  | 184 (9)  | 58 (3)   | 90 (2)   | 200 (4)    | 287 (8)  | 208 (5)  |
| dT9                | 294 (4)  | 175 (5)  | 62 (2)   | 106 (2)  | -          | -        | 225 (3)  |
| G10                | -        | -        | 257 (65) | 86 (2)   | 202 (3)    | 294 (4)  | 201 (5)  |
| C11                | 290 (4)  | 170 (4)  | 60 (2)   | 86 (2)   | 194 (3)    | 279 (6)  | 210 (4)  |
| G12                | 301 (4)  | 172 (4)  | 64 (2)   | 88 (3)   | 206 (5)    | 291 (5)  | 191 (5)  |
| U13                | 292 (5)  | 178 (4)  | 59 (2)   | 87 (1)   | 197 (5)    | 286 (5)  | 206 (5)  |
| A14                | 289 (7)  | 178 (5)  | 58 (3)   | 88 (2)   | 198 (4)    | 289 (4)  | 205 (3)  |
| G15                | 295 (4)  | 167 (5)  | 64 (3)   | 85 (2)   | 197 (4)    | 288 (4)  | 199 (3)  |
| C16                | 289 (6)  | 174 (6)  | 61 (2)   | 89 (2)   | 194 (6)    | 284 (8)  | 214 (4)  |
| G17                | 292 (7)  | 181 (9)  | 61 (3)   | 89 (2)   | 232 (27)   | 293 (12) | 199 (12) |
| dT18               | 204 (76) | 193 (10) | 60 (3)   | 109 (4)  | -          | -        | 238 (8)  |
| A-RNA <sup>b</sup> | 292      | 178      | 54       | 82       | 207        | 289      | 202      |

<sup>a</sup> Mean values in degrees calculated with Curves+ for the 20 structures. The standard deviations are given under brackets

<sup>b</sup> Reference values for canonical RNA structure are from *Nucleic Acids in Chemistry and Biology* (Eds.:G. M. Blackburn, M.J. Gait, D. Loakes, D. M. Williams), Oxford University Press, **1996**, Chapter 2.

**Table S2.** Helical parameters for r(CGCU\*ACGC)dT:r(GCGUAGCG)dT.

| Base Pairs | Shear (Å)  | Stretch (Å) | Stagger (Å) | Buckle (°) | Propeller twist (°) | Opening (°) |
|------------|------------|-------------|-------------|------------|---------------------|-------------|
| C1-G17     | 0.2 (0.4)  | -0.6 (0.7)  | -0.9 (1.4)  | 11 (22)    | 7 (11)              | -2 (10)     |
| G2-C16     | -0.8 (0.5) | -0.5 (0.2)  | -1.5 (0.6)  | -21 (7)    | 4 (11)              | -3 (7)      |
| C3-G15     | 0.3 (0.4)  | -0.3 (0.1)  | -0.8 (0.5)  | 2 (8)      | 6 (9)               | 0 (4)       |
| U*4-A14    | 0.0 (0.2)  | -0.3 (0.0)  | -0.2 (0.2)  | 3 (5)      | -3 (6)              | 3 (3)       |
| A5-U13     | 0.0 (0.3)  | -0.5 (0.2)  | -1.3 (0.5)  | 7 (7)      | 5 (11)              | -1 (5)      |
| C6-G12     | 1.1 (0.7)  | -0.7 (0.3)  | -2.2 (0.6)  | 26 (9)     | 1 (7)               | 1 (9)       |
| G7-C11     | -1.1 (0.5) | -0.6 (0.4)  | -1.7 (0.6)  | -21 (10)   | 5 (7)               | 1 (7)       |
| C8-G10     | 0.7 (0.5)  | -0.4 (0.1)  | -0.7 (0.4)  | 2 (13)     | 14 (7)              | -1 (6)      |

  

| Base Steps | Shift (Å)  | Slide (Å)  | Rise (Å)  | Tilt (°) | Roll (°) | Twist (°) |
|------------|------------|------------|-----------|----------|----------|-----------|
| C1-G2      | -0.2 (0.9) | -1.5 (0.5) | 5.2 (1.1) | 2 (10)   | 4 (10)   | 28 (5)    |
| G2-C3      | 0.2 (0.5)  | -1.2 (0.2) | 3.2 (0.2) | -3 (3)   | -9 (5)   | 34 (2)    |
| C3-U*4     | 0.0 (0.3)  | -1.5 (0.3) | 3.9 (0.5) | -1 (3)   | -4 (4)   | 26 (2)    |
| U*4-A5     | -0.2 (0.4) | -0.8 (0.2) | 3.7 (0.3) | 5 (3)    | 6 (7)    | 32 (2)    |
| A5-C6      | 0.2 (0.5)  | -1.2 (0.2) | 3.1 (0.2) | 4 (3)    | 0 (5)    | 33 (3)    |
| C6-G7      | -0.1 (0.7) | -1.7 (0.4) | 6.1 (0.7) | -3 (3)   | 1 (3)    | 23 (4)    |
| G7-C8      | -0.6 (0.6) | -1.1 (0.3) | 3.0 (0.4) | -5 (5)   | 0 (6)    | 36 (3)    |

  

| Base Pairs | X-displacement (Å) | Y-displacement (Å) | Inclination (°) | Tip (°)    | Axis Bend (°) |
|------------|--------------------|--------------------|-----------------|------------|---------------|
| C1-G17     | -2.4 (0.7)         | 0.3 (0.8)          | -0.8 (11.2)     | -0.8 (6.8) | -             |
| C2-G16     | -2.3 (0.6)         | 0.3 (0.6)          | 0.1 (5.9)       | 5.1 (5.1)  | 1.9 (1.3)     |
| C3-G15     | -1.8 (0.5)         | 0.4 (0.5)          | -1.9 (4.8)      | -3.4 (3.6) | 1.5 (1.0)     |
| U4-A14     | -2.0 (0.6)         | -0.1 (0.4)         | -4.7 (5.3)      | -5.8 (3.5) | 1.4 (1.0)     |
| A5-U13     | -2.2 (0.6)         | 0.4 (0.4)          | -0.7 (4.2)      | 2.0 (4.7)  | 1.3 (0.9)     |
| C6-G12     | -1.9 (0.6)         | 0.2 (0.6)          | 4.1 (4.3)       | 0.6 (4.1)  | 1.5 (1.0)     |
| G7-C11     | -2.2 (0.5)         | -0.6 (0.7)         | 0.9 (5.4)       | 0.5 (3.1)  | 1.4 (0.9)     |
| C8-G10     | -2.7 (0.7)         | 0.4 (0.8)          | -3.8 (6.1)      | 2.5 (5.9)  | 1.6 (0.9)     |

<sup>a</sup> Mean values calculated with Curves+ for the 20 structures. The standard deviations are given under brackets.
